# Supplementary material for: Convalescent Plasmodium falciparum-specific seroreactivity does not correlate with paediatric malaria severity or Plasmodium antigen exposure
Source: Springer Nature journal article supplement (doi:10.1186/s12936-018-2323-4), 2018-04-25

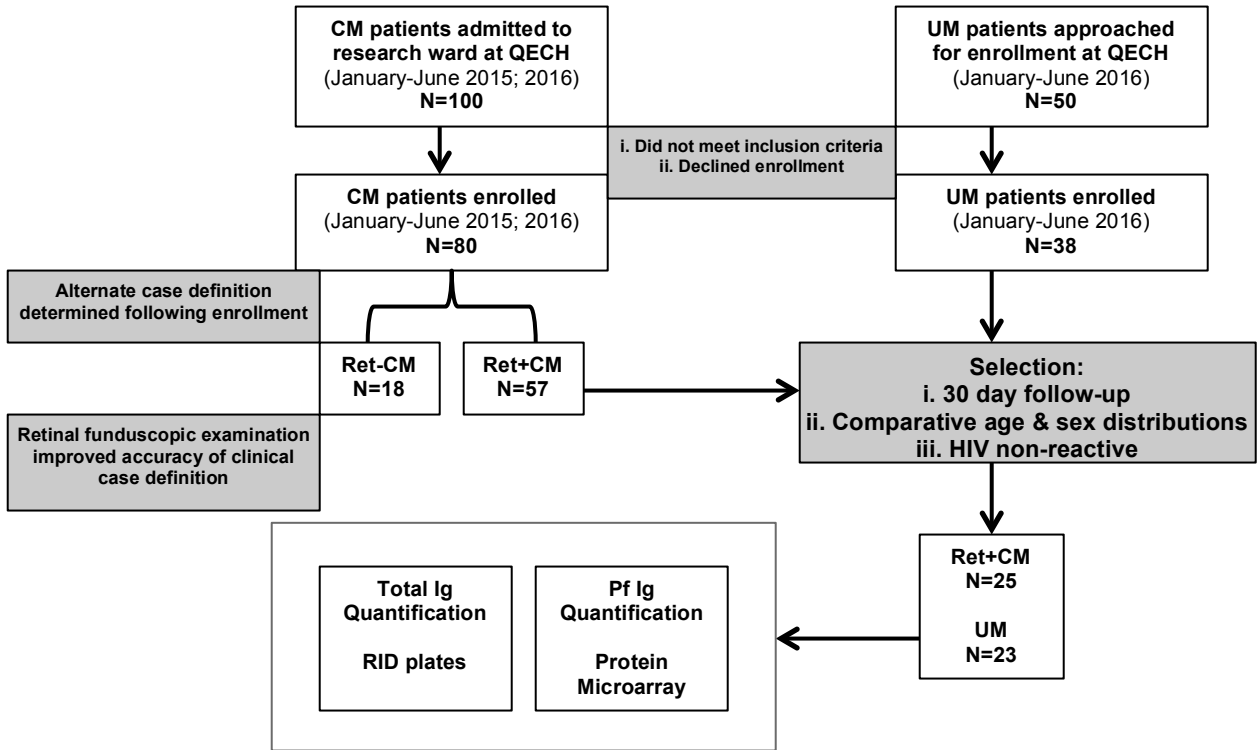

Supplement: MOESM1 [file 15718342]
